# Supplementary material for: Engineering a hyperbranched polyimide membrane for shape memory and CO2 capture
Source: Royal Society of Chemistry journal article supplement (doi:10.1039/c7ta02842c), 2017-01-01
Supplement: c7ta02842c1.pdf [file c7ta02842c1.pdf]

# Supporting Information

## Engineering Hyperbranched Polyimide Membrane for Shape Memory and CO<sub>2</sub> Capture

Zenghui Yang,<sup>†,‡</sup> Qihua Wang,<sup>\*,†</sup> and Tingmei Wang<sup>†</sup>

<sup>†</sup>State Key Laboratory of Solid Lubrication, Lanzhou Institute of Chemical Physics,  
Chinese Academy of Sciences, Lanzhou, 730000, P. R. China

<sup>‡</sup>University of Chinese Academy of Sciences, Beijing, 100039, P. R. China

### List of the Supporting Information

**Part1.** Calculation of the degree of branching for HBPIs.

**Table S1.** <sup>1</sup>H shift of TAP units

**Figure S1.** DSC curves for HBPI0.4-*x*% with different BOA content.

**Figure S2.** WAXD curves for HBPI0.4-*x*% with different BOA content.

**Figure S3.** Once Shape memory cycle.

**Figure S4.** Nitrogen adsorption and desorption isotherms at 77 K (a) and CO<sub>2</sub>/N<sub>2</sub> selectivity at 273 K (b) for HBPI0.4-0%.

**Figure S5.** Nitrogen adsorption and desorption isotherms at 77 K (a) and CO<sub>2</sub>/N<sub>2</sub> selectivity at 273 K (b) for HBPI0.4-25%.

**Figure S6.** Nitrogen adsorption and desorption isotherms at 77 K (a) and CO<sub>2</sub>/N<sub>2</sub> selectivity at 273 K (b) for HBPI0.4-50%.

**Figure S7.** Nitrogen adsorption and desorption isotherms at 77 K (a) and CO<sub>2</sub>/N<sub>2</sub> selectivity at 273 K (b) for HBPI0.4-75%.

**Figure S8.** Nitrogen adsorption and desorption isotherms at 77 K (a) and CO<sub>2</sub>/N<sub>2</sub> selectivity at 273 K (b) for HBPI0.4-100%.

**Figure S9.** <sup>1</sup>HNMR spectra of (a) HBPI<sub>y</sub>-50%, (b) amplification of (a).

**Figure S10.** <sup>13</sup>CNMR spectra of HBPI<sub>y</sub>-50%.

**Figure S11.** DSC curves for HBPI<sub>y</sub>-50% with different DB.

**Figure S12.** TGA curves for HBPI<sub>y</sub>-50% with different DB.

**Figure S13.** Nitrogen adsorption and desorption isotherms at 77 K (a) and CO<sub>2</sub>/N<sub>2</sub> selectivity at 273 K (b) for HBPI0.2-50%.

**Figure S14.** Nitrogen adsorption and desorption isotherms at 77 K (a) and CO<sub>2</sub>/N<sub>2</sub> selectivity at 273 K (b) for HBPI0.6-50%.

**Figure S15.** Nitrogen adsorption and desorption isotherms at 77 K (a) and CO<sub>2</sub>/N<sub>2</sub> selectivity at 273 K (b) for HBPI0.8-50%.

### 1. Calculation of the degree of branching (DB) for hyperbranched polyimides

For hyperbranched polymer, its structural perfection has generally been assessed by degree of branching (*DB*), which is often determined by Frechet's equation (S1):

$$DB = \frac{D+T}{D+T+L} \quad (S1)$$

where *D*, *T* and *L* represent the amounts of dendritic, terminal and linear units, respectively. In this study, *DB* of the resulting HBPIs is calculated from the <sup>1</sup>HNMR spectra based on Eq.(S2). *I<sub>L</sub>* is related to the sum of the peak integrals ascribed to linear units. *I<sub>D</sub>* is associated with the sum of the peak integrals assigning to dendritic

units, and  $I_T$  represents the sum of the peak integrals assigning to terminal units.

$$DB = \frac{I_D + I_T}{I_D + I_T + I_L} \quad (S2)$$

**Figure 2** gives the  $^1\text{H}$ NMR spectra of select formulations of hyperbranched polyimides. As indicated, the peaks in the range of 8.21-7.51 ppm are assigned to the hydrogens of 6FDA, and the peaks at around 7.68-6.51 ppm are ascribed to the aromatic hydrogens of ODA and BOA, while the peaks in the range of 7.99-5.49 ppm are corresponding with the hydrogens in the pyrimidine ring and the free amines in TAP units, which contain the information on degree of branching. The  $^1\text{H}$  shift of TAP units in this range was shown in **Table S1**. H5 is the hydrogen in the pyrimidine ring of TAP units. In this research work, there were two kinds of linear units, which were TAP linear units and ODA+BOA linear units. So  $I_L$  is the sum of  $I_{L\text{-ODA}}$ ,  $I_{L\text{-BOA}}$  and  $I_{L\text{-TAP}}$ .  $I_T$  is the sum of the peak intensities at 5.49 and 5.87 ppm, while  $I_{L\text{-TAP}}$  is the sum of the peak intensities at 6.74 and 6.93 ppm, and  $I_D$  is the peak intensities at 7.99 ppm. The hydrogens of ODA/BOA at around 7.26 ppm and 7.79 ppm were overlapped with those of 6FDA and  $\text{NH}_2$  of 4,6-diimide, so  $I_{L\text{-ODA+BOA}}$  can be obtained by Eq. (S3) using the molar ratio of TAP:(ODA+BOA).

$$\frac{Mol_{(ODA+BOA)}}{Mol_{(TAP)}} = \frac{I_{L-(ODA+BOA)} / 2}{I_D / 3 + I_{L-TAP} / 2 + I_T} \quad (S3)$$

Finally, DB can be calculated according to Eq. (S2) and its values are summarized in **Table 1**.

**Table S1.**  $^1\text{H}$  shift of TAP units

|   | Structure unit    | Chemical shift (ppm) |                  |
|---|-------------------|----------------------|------------------|
|   |                   | H <sub>5</sub>       | -NH <sub>2</sub> |
| T | 2-monoimide       | 5.49                 | 6.49             |
|   | 4-, 6-monoimide   | 5.87                 | 6.38             |
| L | 2,4-, 2,6-diimide | 6.74                 | 7.79             |
|   | 4,6-diimide       | 6.93                 | 7.51             |
| D | triimide          | 7.99                 | no               |

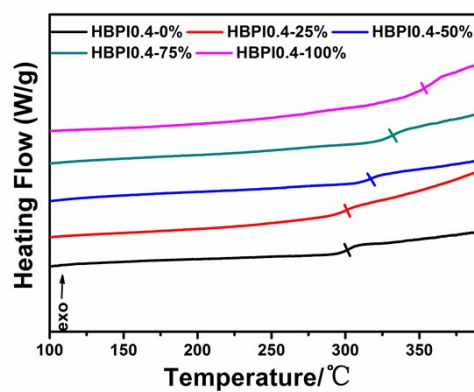

**Figure S1.** DSC curves for HBPI0.4- $x$ % with different BOA content.

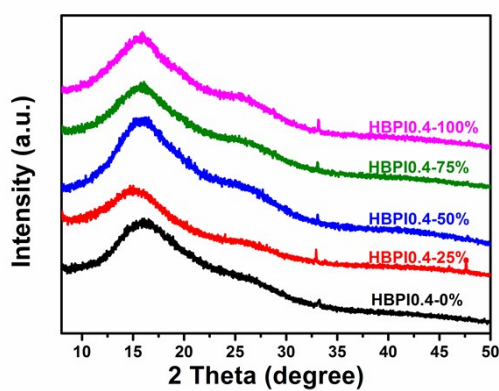

**Figure S2.** WAXD curves for HBPI0.4- $x$ % with different BOA content.

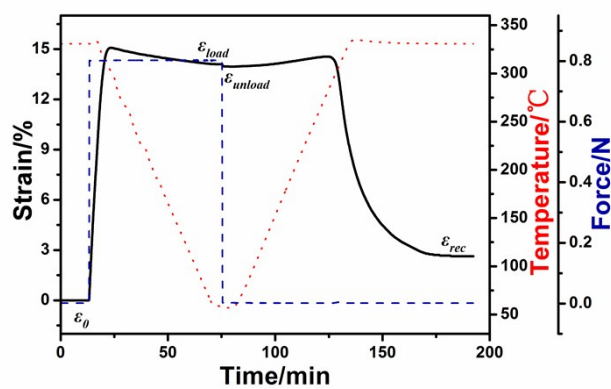

**Figure S3.** Once Shape memory cycle.

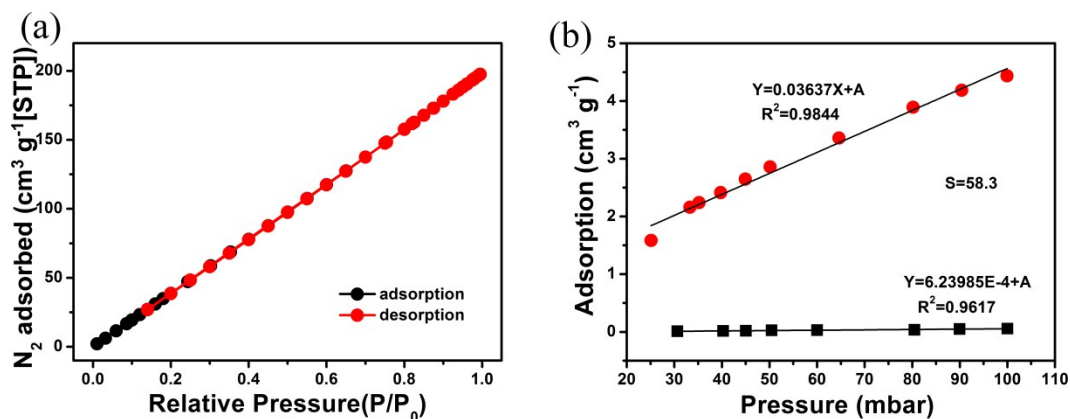

**Figure S4.** Nitrogen adsorption and desorption isotherms at 77 K (a) and  $CO_2/N_2$  selectivity at 273 K (b) for HBPI0.4-0%.

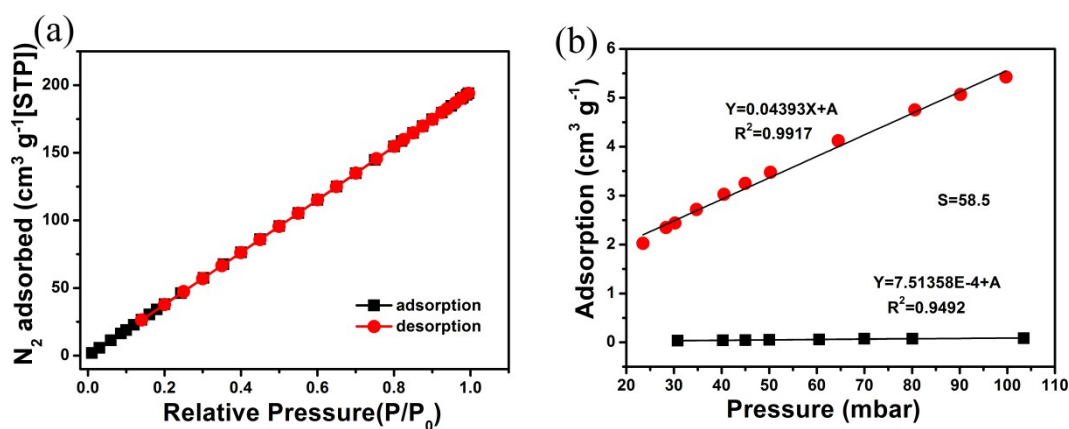

**Figure S5.** Nitrogen adsorption and desorption isotherms at 77 K (a) and  $CO_2/N_2$  selectivity at 273 K (b) for HBPI0.4-25%.

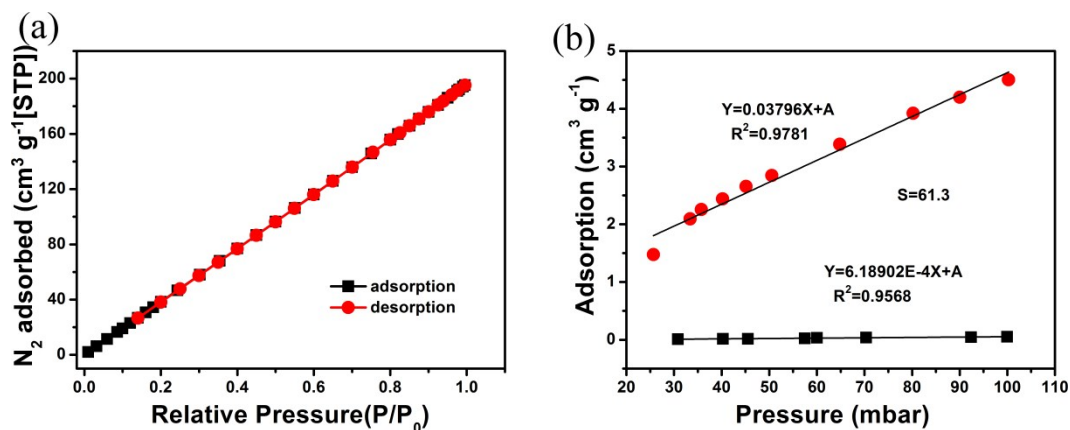

**Figure S6.** Nitrogen adsorption and desorption isotherms at 77 K (a) and  $CO_2/N_2$  selectivity at 273 K (b) for HBPI0.4-50%.

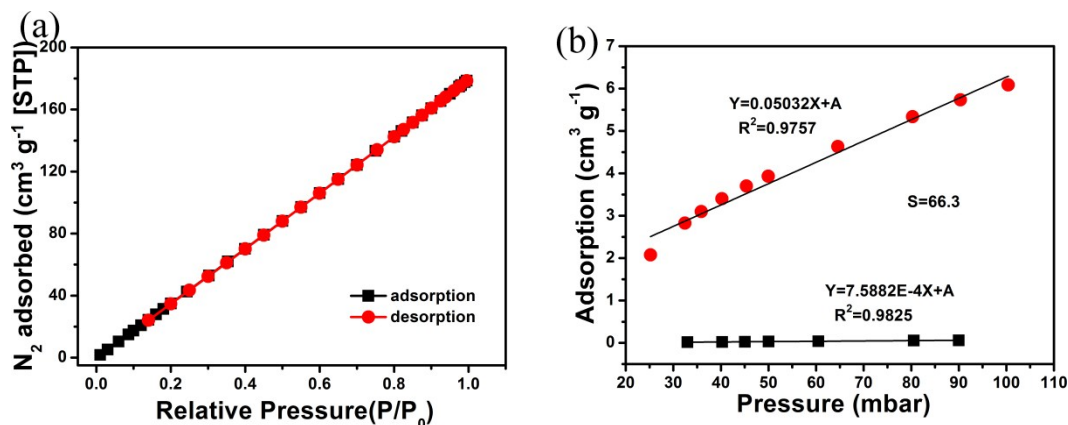

**Figure S7.** Nitrogen adsorption and desorption isotherms at 77 K (a) and  $CO_2/N_2$  selectivity at 273 K (b) for HBPI0.4-75%.

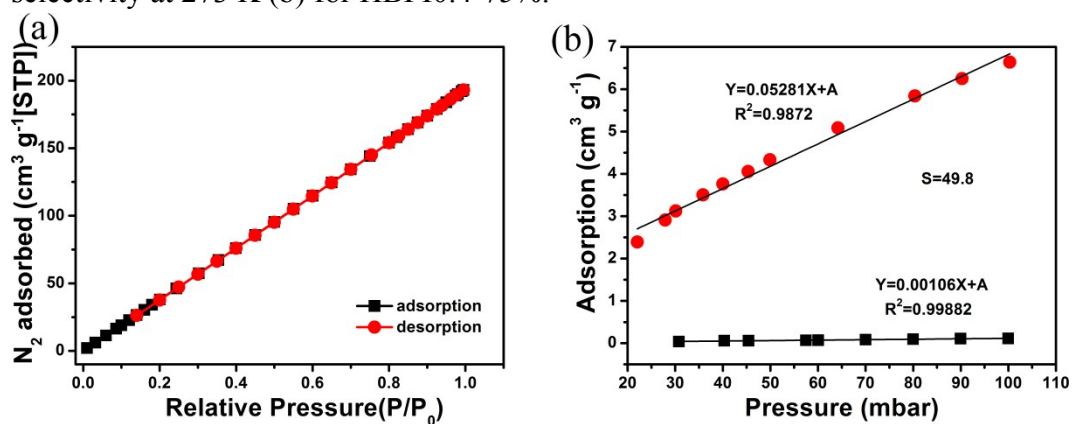

**Figure S8.** Nitrogen adsorption and desorption isotherms at 77 K (a) and  $CO_2/N_2$  selectivity at 273 K (b) for HBPI0.4-100%.

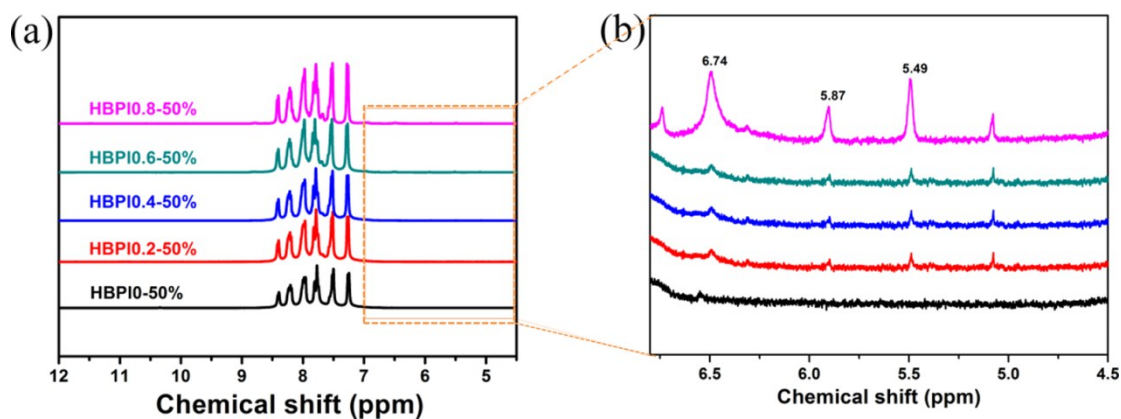

**Figure S9.**  $^1H$ NMR spectra of (a) HBPIy-50%, (b) amplification of (a).

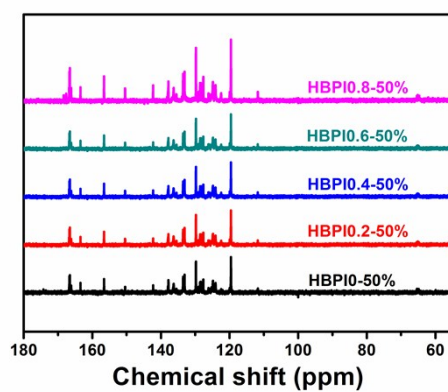

**Figure S10.**  $^{13}\text{C}$ NMR spectra of HBPI $y$ -50%.

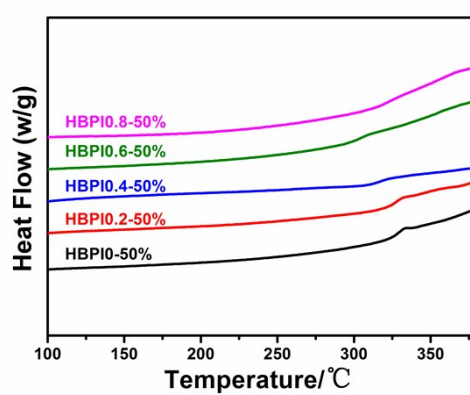

**Figure S11.** DSC curves for HBPI $y$ -50% with different DB.

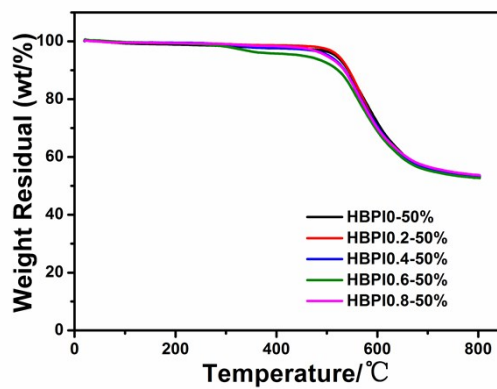

**Figure S12.** TGA curves for HBPI $y$ -50% with different DB.

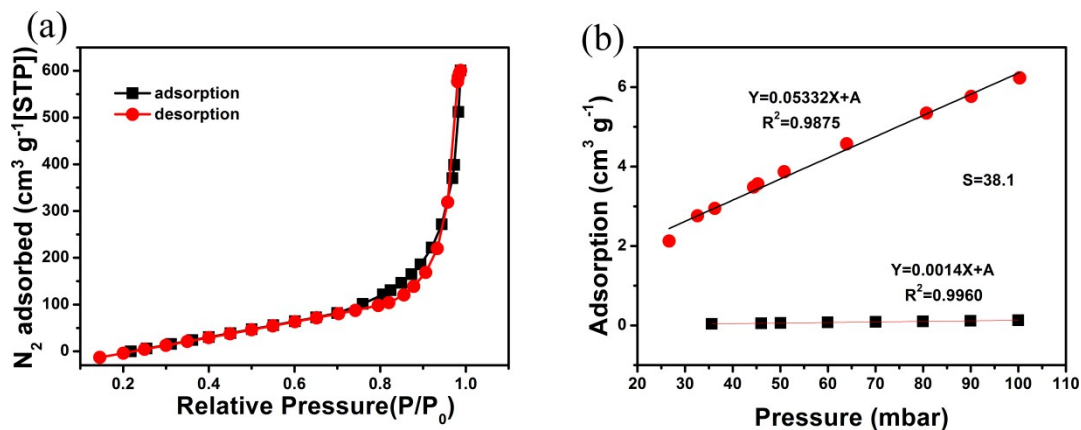

**Figure S13.** Nitrogen adsorption and desorption isotherms at 77 K (a) and  $CO_2/N_2$  selectivity at 273 K (b) for HBPI0.2-50%.

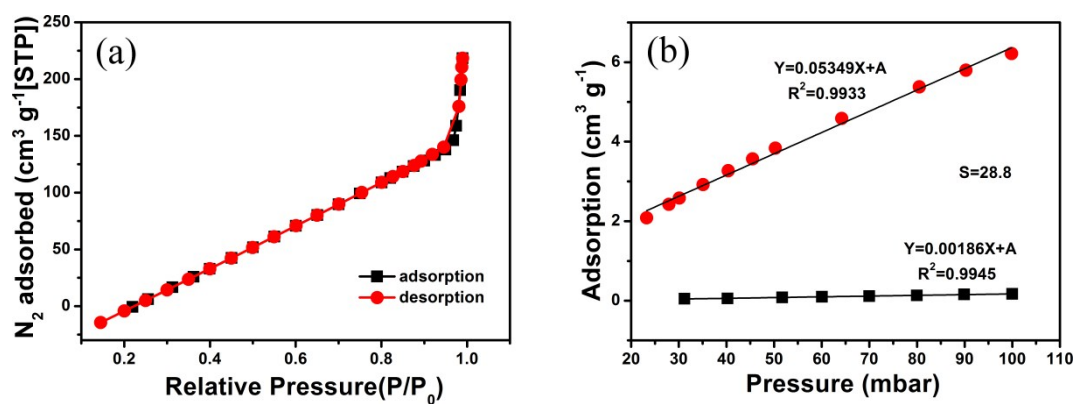

**Figure S14.** Nitrogen adsorption and desorption isotherms at 77 K (a) and  $CO_2/N_2$  selectivity at 273 K (b) for HBPI0.6-50%.

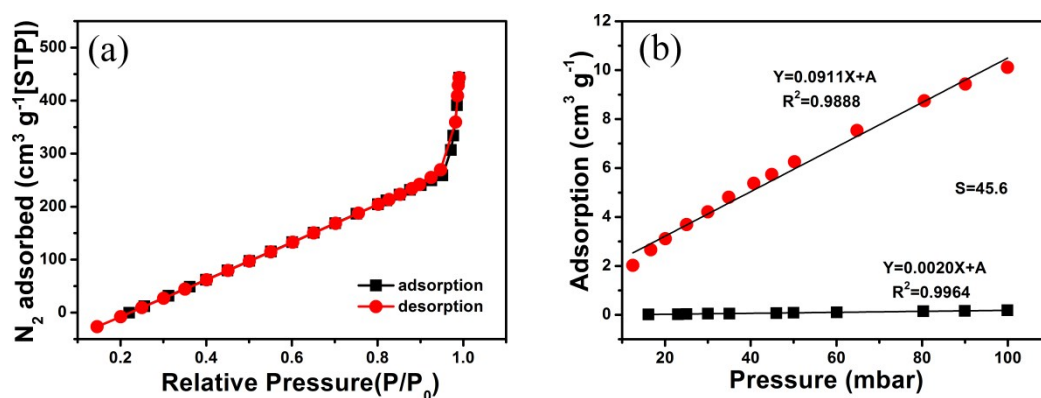

**Figure S15.** Nitrogen adsorption and desorption isotherms at 77 K (a) and  $CO_2/N_2$  selectivity at 273 K (b) for HBPI0.8-50%.
